# Supplementary material
Source: PubMed Central journal article supplement (PMC7657480)
Supplement: joces-133-248823-s1.pdf [file joces-133-248823-s1.pdf]

**A**

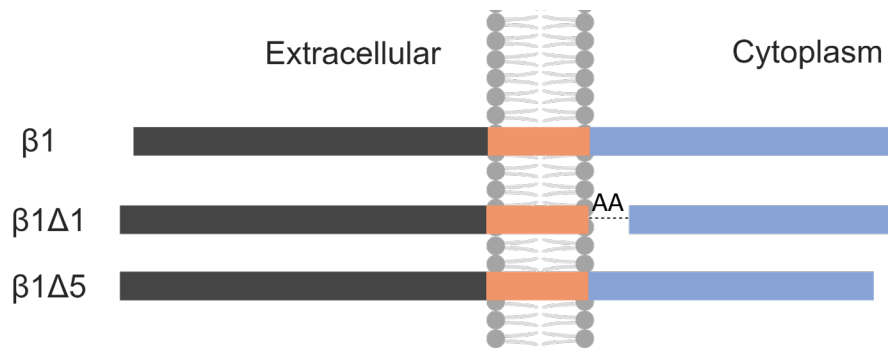

**B**

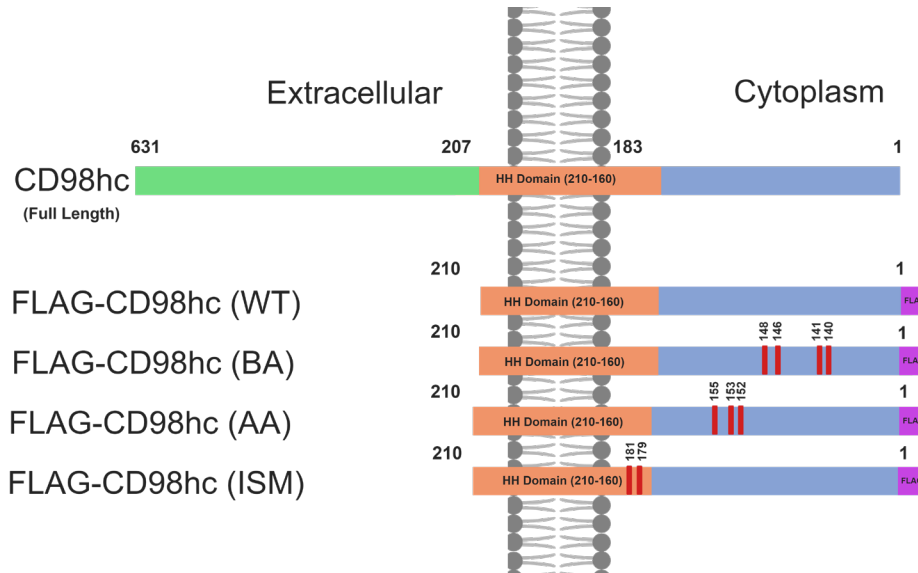

**C**

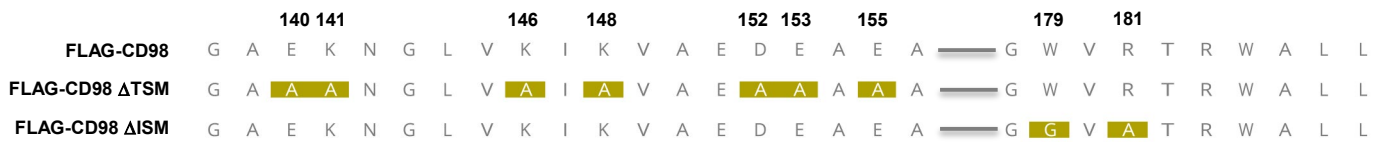

**Supplementary Figure S1**

**Figure S1 - Diagram of mutant  $\beta$ 1-integrin and CD98hc constructs.**

(A) Each mutant construct contains the carbonic anhydrase IV (CAIV) enzyme extracellular (EC, black) domain connected to the transmembrane (orange) domain of LDL, and the whole or partial deletions ( $\Delta$ 1 and  $\Delta$ 5) of the  $\beta$ 1-integrin intracellular (blue) domain; AA represents replacement of deleted segment with alanine.  $\beta$ 1 $\Delta$ 5 represents a construct that lacks last six AA  $\beta$ 1-integrin intracellular domain. (B) Schematic showing full length CD98hc with its high homology domain (HH domain). Schematic depicting truncated, FLAG tagged CD98hc mutants with wild type (FLAG-CD98hc (WT)), mutated acidic residues (FLAG-CD98hc (AA)), mutated basic residues (FLAG-CD98hc (BA)) and mutated  $\beta$ 1-integrin interacting residues (FLAG-CD98hc (ISM)).(C) Aminoacid composition of wild type (FLAG CD98), acidic and basic residue mutants (FLAG-CD98 $\Delta$ TSM) and mutant integrin interacting residues (FLAG-CD98 $\Delta$ ISM).

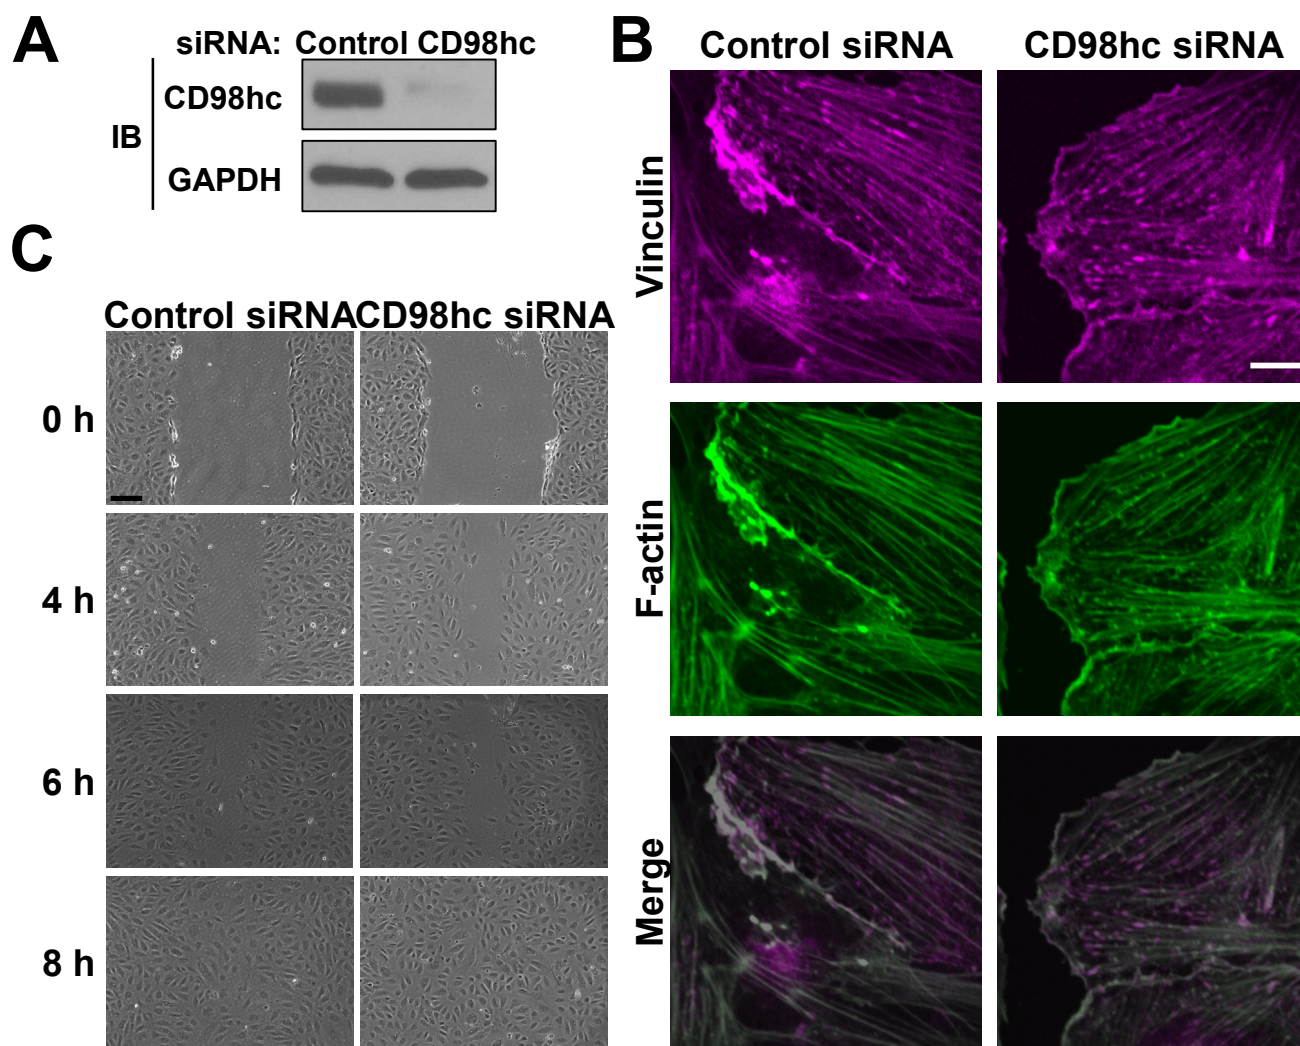

Supplementary Figure S2

**Figure S2 - CD98hc is not required for cell migration. (A)**

Immunoblots showing CD98hc and GAPDH protein levels in HUVE cells transfected with control or CD98hc siRNA. (B) Fluorescence micrographs of HUVE cells transfected with control or CD98hc siRNA showing formation of focal adhesions containing vinculin (magenta) and F-actin (green). (C) Phase contrast photomicrographs showing cell migration following scratch wound of monolayer of HUVE cells transfected with control or CD98hc siRNA (bar, 200  $\mu$ m).(n=3 replicates)

**A**

Human CD98hc <sup>160</sup> **KFTGLSKEELLKVAGSPGWVTRWALLLLFWLWLGMLAGAVVIVRAPRC** <sup>210aa</sup>  
 Mouse CD98hc **KFTGLSKEELLKVAGSPGWVTRWALLLLFWLWLGMLAGAVVIVRAPRC**  
 Xenopus CD98hc **KFTGLSKEELLRVAGTPTWVRVRWALLILFWLWAGMLAGAVVIVQAPRC**  
 Drosophila CD98hc **AFTGMSKEELMKYANDPFWVRLRWIFFVCFWAIWVGMLVGAILIIIGAPKC**  
 \* \* \* \* \* . . . . . \* \* \* \* \* . . . . . \* \* \* \* \* . . . . . \* \* \* \* \* . . . . . \* \* \* \* \*

**B**

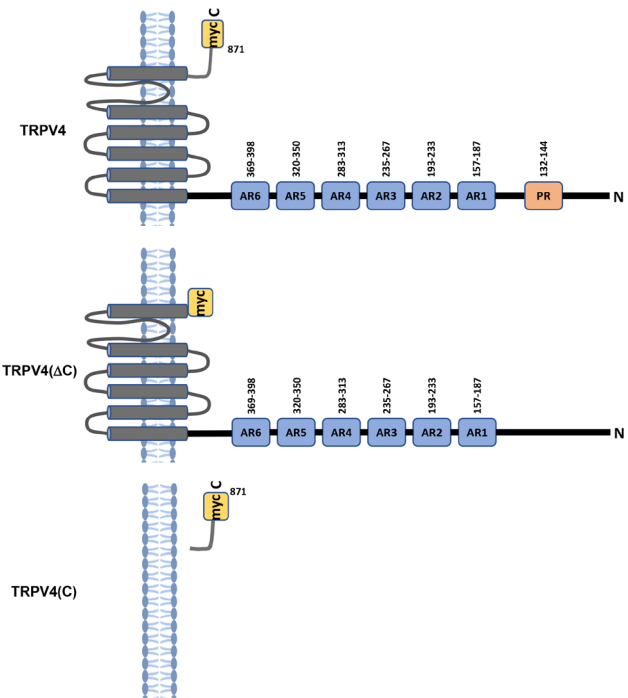

**C**

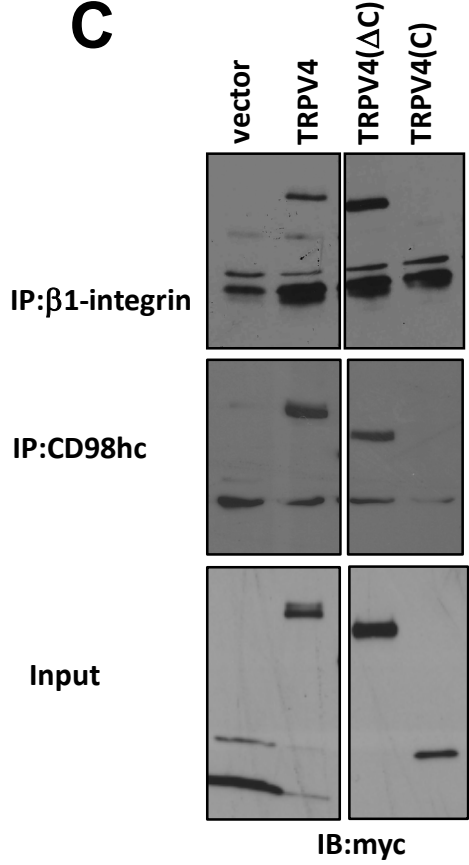

Supplementary Figure S3

**Figure S3 - CD98hc HH domain is highly conserved from drosophila to mammals.** (A) Schematic diagram of CD98hc, CD98hc(HH), and CD98hc( $\Delta$ HH) constructs containing high homology (HH, orange) within amino acid (aa) sequences 160-210. Amino acid sequences 160-210 in human, mouse, *Xenopus*, and *Drosophila* CD98hc (“\*” indicates identity, “:” indicates high similarity, and “.” indicates low similarity in amino acids between the different species). (B) Schematic diagram of various full length and deletion TRPV4 constructs from top to bottom: full length TRPV4 (TRPV4), , TRPV4 lacking carboxy terminal (TRPV4( $\Delta$ C)), and TRPV4 carboxy terminal only (TRPV4(C)). (C) Myc-tagged TRPV4 constructs immunoprecipitated with  $\beta$ 1-integrin (Top) or CD98hc (middle) antibody in lysates from HEK293T cells transfected with indicated DNA constructs; inputs from corresponding IPs are shown in the bottom panel.

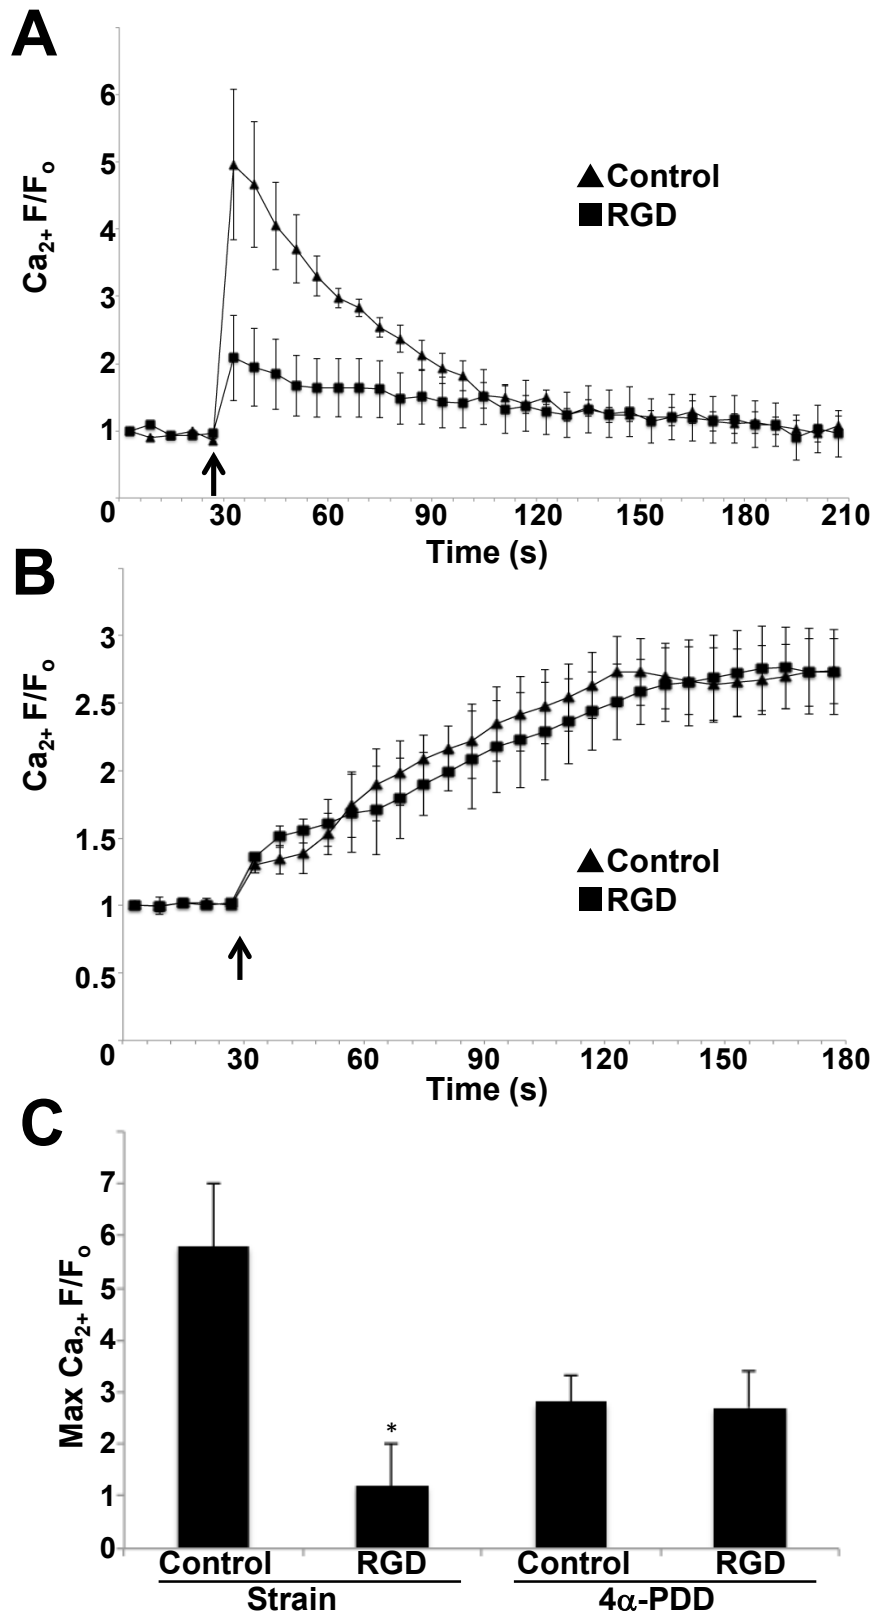

Supplementary Figure S4

**Figure S4 - Mechanisms of mechanical and chemical**

**activation of TRPV4 are distinct.** Relative changes in cytosolic calcium ( $Ca_{2+} F/F_0$ ) in Fluo-4-loaded HUVE cells in response to 15% static strain for 4 s (**A**) or the TRPV4 chemical activator, 10 $\mu$ M 4 $\alpha$ -PDD (**B**) in the presence or absence of RGD peptide (10  $\mu$ M). (**C**) Average maximum relative changes in cytosolic calcium (Max  $Ca_{2+} F/F_0$ ) in cells described in panels **A** and **B** (n=3, \* p<0.05 vs strain control).



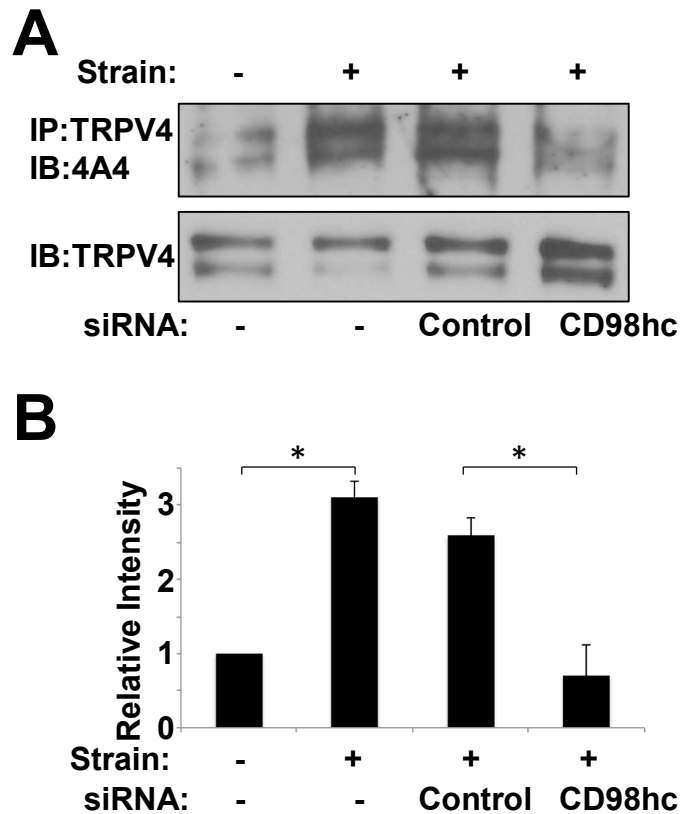

## Supplementary Figure S5

### Figure S5 - CD98hc knockdown prevents TRPV4

**phosphorylation induced by mechanical strain.** (A) Immunoblots showing phosphorylated TRPV4 from lysates of control HUVE cells or HUVE cells treated with control or CD98hc siRNA and exposed to cyclic substrate strain (15%, 1 Hz, 2 h) detected using the 4A4 anti-phosphoserine antibody. (B) Histogram showing the densitometric quantification of immunoblots in A (n=3, \*p<0.05).

**Table S1 Interaction residues between hTRPV4 and CD98 (P121-S166).** Predicted interacting residues in hTRPV4 and CD98 (P121-S166), and corresponding hydrogen (H) – bonds between the residues. **Notice:** The human TRPV4 (PDB ID: 4DX2) forms a dimer in crystal. R224a and R224b are from different monomers from hTRPV4.

| hTRPV4            | CD98 (P121-S166) | H-bonds (Å) |
|-------------------|------------------|-------------|
| K311              | K148             | 1.7         |
| R224 <sup>a</sup> | D152             | 1.9         |
| K310              | D152             | 1.9         |
| R224 <sup>b</sup> | D152             | 2.4         |
| R316              | E153             | 1.9 and 2.3 |
| R224 <sup>b</sup> | E155             | 1.8 and 2.0 |

**Notice:** The human TRPV4 (PDB ID: 4DX2) forms a dimer in crystal. R224<sup>a</sup> and R224<sup>b</sup> are from different monomers from hTRPV4.

**Table S2.** Interaction residues between the cytoplasmic tail of  $\beta$ 1 integrin (N792-K798) to the HH domain of CD98hc (K161-R210).

| <b><math>\beta</math>1 integrin (N792-K798)</b> | <b>CD98hc (K161-R210)</b> | <b>H-bonds (Å)</b> |
|-------------------------------------------------|---------------------------|--------------------|
| <b>K794</b>                                     | <b>E168</b>               | 2.5 and 2.7        |
| <b>Y795</b>                                     | <b>W179</b>               | 2.8                |
| <b>E796</b>                                     | <b>R181</b>               | 2.8 and 3.2        |

**Table S3. Key reagents.**

| REAGENT or RESOURCE                                                                    | SOURCE          | IDENTIFIER                                         |
|----------------------------------------------------------------------------------------|-----------------|----------------------------------------------------|
| <b>Antibodies</b>                                                                      |                 |                                                    |
| Rabbit Anti-Mouse TRPV4 Polyclonal Antibody, Unconjugated                              | Abcam           | Abcam Cat# ab39260,<br>RRID:AB_1143677             |
| Rabbit Anti-TRPV4 Polyclonal Antibody, Unconjugated                                    | Alomone Labs    | Alomone Labs Cat# ACC-034,<br>RRID:AB_2040264      |
| Mouse Anti-CD29 Monoclonal Antibody, Unconjugated, Clone 18                            | BD Biosciences  | BD Biosciences Cat# 610467,<br>RRID:AB_2128060     |
| Rabbit Anti-human CD98 Monoclonal Antibody, Unconjugated                               | Abcam           | Abcam Cat# ab108300,<br>RRID:AB_10863340           |
| Mouse Anti-Vinculin Monoclonal Antibody, Unconjugated                                  | Sigma-Aldrich   | Sigma-Aldrich Cat# V9131,<br>RRID:AB_477629        |
| Rabbit Anti-HA tag Polyclonal Antibody, Unconjugated                                   | Sigma-Aldrich   | Sigma-Aldrich Cat# SAB4300603,<br>RRID:AB_10620829 |
| Mouse Anti-Human Carbonic anhydrase iv Monoclonal antibody, Unconjugated, Clone 310413 | R and D Systems | R and D Systems Cat# MAB2186,<br>RRID:AB_2259244   |
| Rabbit Anti-Myc tag Polyclonal Antibody, Unconjugated                                  | Millipore       | Millipore Cat# 06-549,<br>RRID:AB_11212682         |
| Mouse Anti-Phosphoserine Monoclonal antibody, Unconjugated, Clone 4A4                  | Millipore       | Millipore Cat# 05-1000,<br>RRID:AB_11210897        |

|                                                                           |                           |                                                       |
|---------------------------------------------------------------------------|---------------------------|-------------------------------------------------------|
| Mouse Anti-Glyceraldehyde-3-PDH (GAPDH) Monoclonal antibody, Unconjugated | Millipore                 | Millipore Cat# MAB374, RRID:AB_2107445                |
| Rabbit Anti-FLAG tag Polyclonal Antibody, Unconjugated                    | Sigma-Aldrich             | Sigma-Aldrich Cat# F7425, RRID:AB_439687              |
| Mouse Anti-FLAG tag Monoclonal Antibody, Unconjugated                     | Sigma-Aldrich             | Sigma-Aldrich Cat# F3165, RRID:AB_259529              |
| Mouse Anti-FLAG(R) M2 Affinity Gel antibody                               | Sigma-Aldrich             | Sigma-Aldrich Cat# A2220, RRID:AB_10063035            |
| Mouse Anti-human CD98 (E-5) Monoclonal Antibody, Unconjugated             | Santa Cruz Biotechnology  | Santa Cruz Biotechnology Cat# sc-376815               |
| Goat Anti-Human CD98 (C-20) Polyclonal, Unconjugated antibody             | Santa Cruz Biotechnology  | Santa Cruz Biotechnology Cat# sc-7095, RRID:AB_638284 |
| Alexa Fluor 488 Phalloidin antibody                                       | Thermo Fisher Scientific  | Thermo Fisher Scientific Cat# A12379, RRID:AB_2315147 |
| Talin-1 (C45F1) Rabbit mAb antibody                                       | Cell Signaling Technology | Cell Signaling Technology Cat# 4021, RRID:AB_2204018  |
| <b>Chemicals, Peptides, and Recombinant Proteins</b>                      |                           |                                                       |
| 4 $\alpha$ -Phorbol 12,13-didecanoate                                     | Sigma-Aldrich             | Sigma-Aldrich Cat# P8014                              |
| Phalloidin-iFluor 405 Reagent                                             | Abcam                     | Abcam Cat# ab176752                                   |
| Fluo-4, AM, cell permeant                                                 | Thermo Fisher Scientific  | Thermo Fisher Scientific Cat# F14201                  |
| Linear RGD peptide                                                        | Bachem                    | Bachem Cat# H-7356                                    |

|                                                                         |                   |                                 |
|-------------------------------------------------------------------------|-------------------|---------------------------------|
| Targfect-HUVEC                                                          | Targeting systems | Targeting systems Cat# HUVEC-01 |
|                                                                         |                   |                                 |
| <b>Deposited Data</b>                                                   |                   |                                 |
| Crystal structure of the human TRPV4 ankyrin repeat domain              | 10.1021/bi300279b | 10.2210/pdb4DX2/pdb             |
|                                                                         |                   |                                 |
| <b>Experimental Models: Cell Lines</b>                                  |                   |                                 |
| Primary Umbilical Vein Endothelial Cells; Normal, Human, Pooled (HUVEC) | ATCC              | ATCC Cat# PCS-100-013           |
| 293T/17 [HEK 293T/17]                                                   | ATCC              | ATCC Cat# CRL-11268             |
|                                                                         |                   |                                 |
| <b>Oligonucleotides</b>                                                 |                   |                                 |
| siRNA targeting sequence human CD98hc #1: 5'-GAAUGGUCUGGUGAAGAUC-3'     | Qiagen            | N/A                             |
| siRNA targeting sequence human CD98hc #2: 5'-GAUCUUCACCAGACCAUUC-3'     | Qiagen            | N/A                             |
|                                                                         |                   |                                 |
| <b>Recombinant DNA</b>                                                  |                   |                                 |
| pCMV-HA vector                                                          | Takara Bio        | Takara Bio Cat# 635690          |
| pCMV-CD98hc-HA                                                          | This paper        | Based on NM_001012662           |

|                                                            |                          |                                                                                                                                                                         |
|------------------------------------------------------------|--------------------------|-------------------------------------------------------------------------------------------------------------------------------------------------------------------------|
| pCMV-CD98hc( $\Delta$ HH)-HA                               | This paper               | N/A                                                                                                                                                                     |
| pCMV-CD98hc(HH)-HA                                         | This paper               | N/A                                                                                                                                                                     |
| pCMV-myc vector                                            | Takara Bio               | Takara Bio Cat# 635689                                                                                                                                                  |
| pCMV-TRPV4-myc                                             | This paper               | N/A                                                                                                                                                                     |
| pCMV-TRPV4(DPR)-myc                                        | This paper               | N/A                                                                                                                                                                     |
| pCMV-TRPV4(DAR1-3)-myc                                     | This paper               | N/A                                                                                                                                                                     |
| pcDNA <sup>TM</sup> 3.1/Zeo(-) Mammalian Expression Vector | Thermo Fisher Scientific | Thermo Fisher Scientific Cat#V86520                                                                                                                                     |
| pcDNA3.1(-)-FLAG-CD98hc(WT)                                | This paper               | N/A                                                                                                                                                                     |
| pcDNA3.1(-)-FLAG-CD98hc(ISM)                               | This paper               | N/A                                                                                                                                                                     |
| pcDNA3.1(-)-FLAG-CD98hc(AA)                                | This paper               | N/A                                                                                                                                                                     |
| pcDNA3.1(-)-FLAG-CD98hc(BA)                                | This paper               | N/A                                                                                                                                                                     |
|                                                            |                          |                                                                                                                                                                         |
| <b>Software and Algorithms</b>                             |                          |                                                                                                                                                                         |
| PEP-FOLD 3.0                                               | 10.1093/nar/gkw329       | <a href="http://mobylye.rpbs.univ-paris-diderot.fr/cgi-bin/portal.py#forms::PEP-FOLD3">http://mobylye.rpbs.univ-paris-diderot.fr/cgi-bin/portal.py#forms::PEP-FOLD3</a> |
| ClusPro 2.0                                                | 10.1038/nprot.2016.169   | <a href="https://cluspro.org">https://cluspro.org</a>                                                                                                                   |
| GraphPad Prism                                             | Graphpad                 | <a href="https://www.graphpad.com/scientific-software/prism/">https://www.graphpad.com/scientific-software/prism/</a>                                                   |
| Leica Application Suite                                    | Leica Microsystems       | <a href="https://www.leica-microsystems.com/products/microsc">https://www.leica-microsystems.com/products/microsc</a>                                                   |

|                      |                                                                                                   |                                                                                                                                                                   |
|----------------------|---------------------------------------------------------------------------------------------------|-------------------------------------------------------------------------------------------------------------------------------------------------------------------|
|                      |                                                                                                   | ope-software/details/product/leica-application-suite/                                                                                                             |
| ZEN imaging software | Zeiss                                                                                             | <a href="https://www.zeiss.com/microscopy/us/products/microscope-software/zen.html">https://www.zeiss.com/microscopy/us/products/microscope-software/zen.html</a> |
| Cell profiler        | <a href="https://doi.org/10.1186/gb-2006-7-10-r100">https://doi.org/10.1186/gb-2006-7-10-r100</a> | <a href="https://cellprofiler.org/releases/">https://cellprofiler.org/releases/</a>                                                                               |
|                      |                                                                                                   |                                                                                                                                                                   |
